# Supplementary material
Source: MDPI journal article supplement (https://www.mdpi.com/2297-8739/3/2/13)
Supplement: s1 [file s1]

Supplementary Materials: Effects of Growth Parameters on the Analysis of *Aspergillus flavus* Volatile Metabolites

Dongdi Sun, Jinyan She, Julie L. Gower, C. Elizabeth Stokes, Gary L. Windham, Richard E. Baird and Todd E. Mlsna *

1. Properties of the Data

MVOC data analysis can play a critical role in the discrimination and classification of fungal isolates. Some factors that should be considered before performing multivariate analysis:

1. Differences in orders of magnitude between measured MVOC concentrations are common, however, MVOCs present in high concentrations are not necessarily more important than those present at low concentration.
2. Some MVOCs show large fluctuations in concentration under identical experimental conditions. This is due to uninduced biological variation which can be attributed to phenotype variation. Thus not all data fluctuations can be attributed to random or systematic error.
3. MVOC data from fungus tends to be heteroscedastic, thus the assumption that the total uninduced variation resulting from biology sampling, and analytical measurements is symmetric around zero with equal standard deviation is not true. Deviations in data from heteroscedasticity can be reduced with data pretreatment.
4. Errors in experimental data also originates from the sampling, sample work-up and instrument errors.

2. Data Pretreatment Methods

In this section, data pretreatment methods used in this paper are demonstrated with reasons for each treatment discussed.

1. After analysis of a MVOC sample using GC-MS, the gas chromatogram was corrected using the background subtraction options in the Agilent GC-MS data analysis software. The difference between treated chromatograms and untreated chromatogram is shown in Figure S1. The MVOC data report was generated in excel format by simply selecting the customized data analyzing methods using Agilent GC-MS data analysis software. Some important data information included retention time, peak area, peak area % and compound name as shown in Figure S2.

| 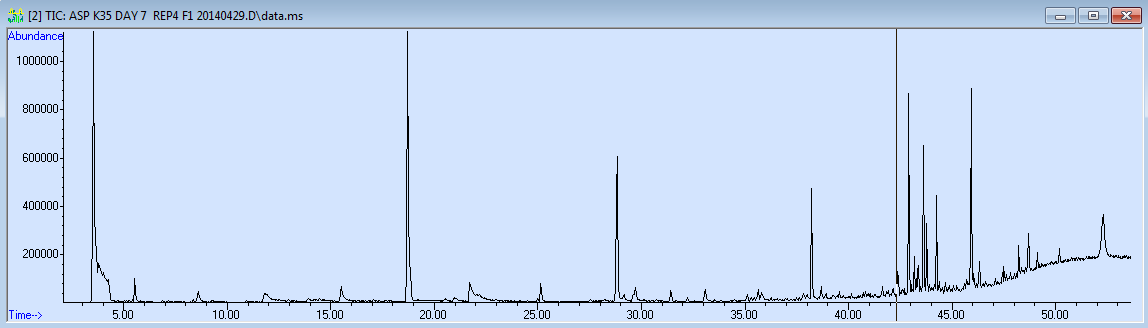 |
| --- |
| (**A**) |
| 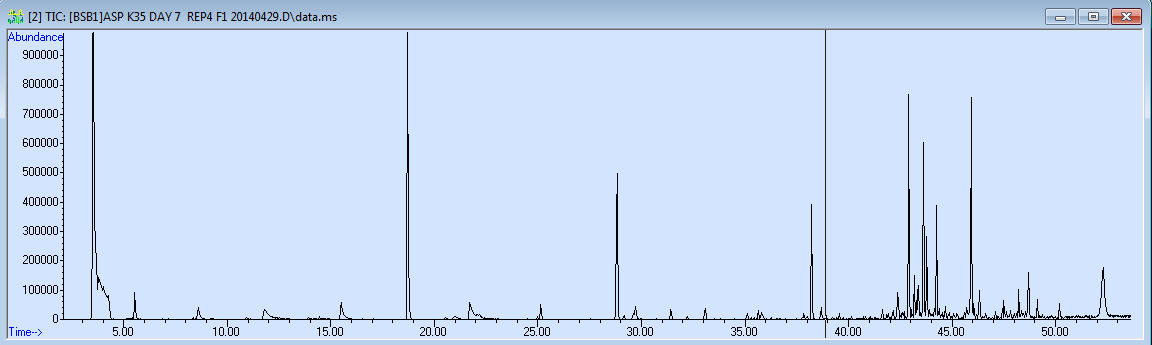 |
| (**B**) |

**Figure S1.** TIC chromatogram comparison with (**A**) and without (**B**) background subtraction.


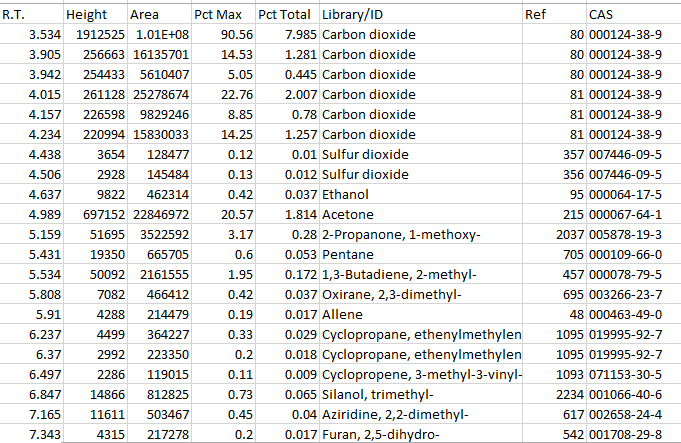


**Figure S2.** Excel documents of MVOC data analyzed by Agilent GC-MS data analysis software.
R.T. = retention time, Height = peak height, Area= peak area, Pct Total= peak area percentage, Library/ID = compound name, Ref = reference number in NIST library and CAS = CAS number of
the compound.

1. The retention time, peak area and compound name information were kept; then replication data, was saved in the same excel file for peak alignment (Figure S3).


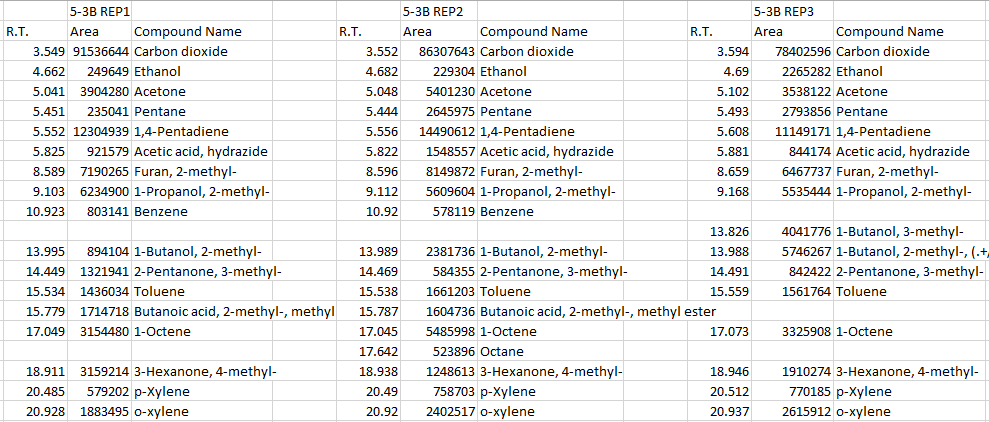


**Figure S3.** Sample subset of the replication data of 5-3B in excel for peak alignment. For each replication data including R.T. (retention time), Area (peak area) and compound name.

1. Retention time differences were observed to vary around a mean. This can be attributed to instrument and personal error which requires accurate correction for proper MVOC analysis. Compounds with low repeatability, appearing in less than 40% of the replicates, were deleted from further consideration. The remaining MVOC peaks were matched in a row with identical compounds from replicate analysis with close retention times. The revised data for one particular isolate is shown in Figure S4 where retention times and peak area are matched from 12 replicates. It should be mentioned that, compound names were not yet confirmed by this step.


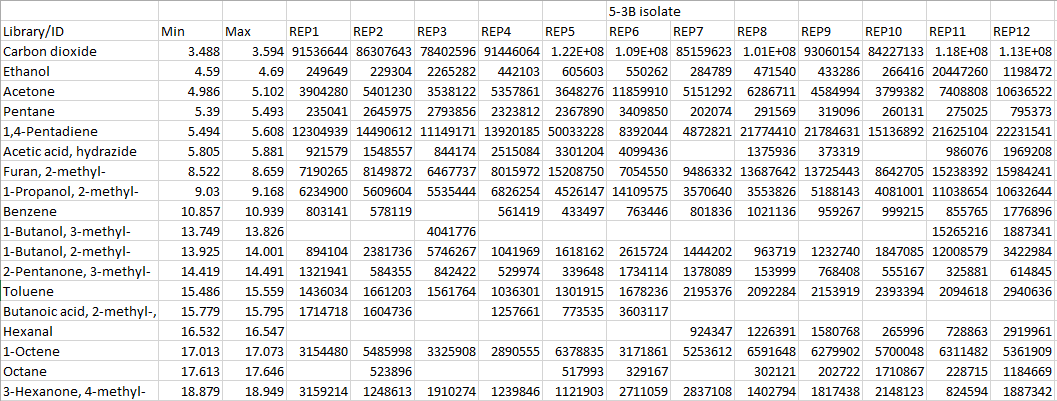


**Figure S4.** A subset of the revised MVOC data of isolate 5-3B with retention time range
(Min = minimum retention time and Max = maximum retention time) and peak area from
each replicate.

1. Data from different isolates and controls were combined in one excel file where mean and standard deviation of retention time were calculated (Figure S5). The file also contains the peak areas for each MVOC for each replicate.


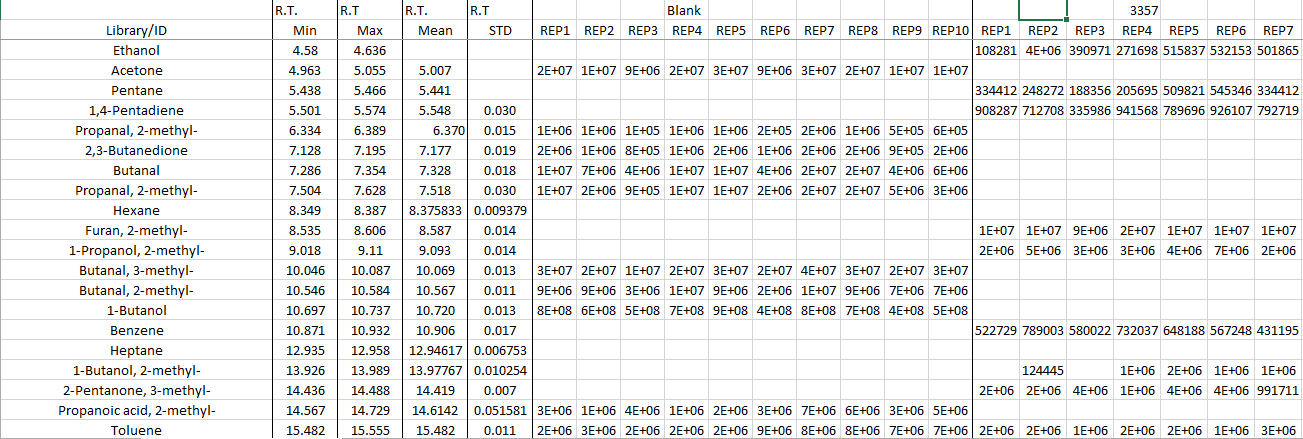


**Figure S5.** Subset of the combined data from different isolates and control. Data columns include compound name (Library ID), minimum retention time, maximum retention time, mean and standard deviation of retention time. 10 replicates of blank and 7 replicates of 3557 are only shown.

1. The MVOCs were grouped into 12 chemical classes based on their functional group (Figure S6).


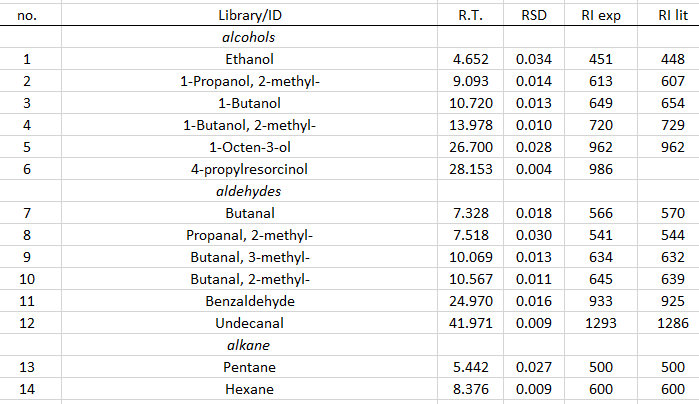


**Figure S6.** A subset of the grouped MVOC data format with experimental and literature RI value.

1. The retention index of each compound was calculated based on Equation (1) using alkane standards. The literature retention index of each compound was obtained from a NIST webbook library. The compound names were confirmed using Mass Spectrum library search and
   RI value matchup.

|  | (1) |
| --- | --- |

*I* = Kovats retention index,

*n* = the number of carbon atoms in the smaller *n*-alkane,

*N* = the number of carbon atoms in the larger *n*-alkane,

*t*r = the retention time.

1. The 78 identified compounds which have a low relative standard deviation (RSD < 60%) were selected as input for statistical software. The MVOC data was converted to the proper input format for SIMCA P + software. The row input is the samples from different isolates and column input is peak area percentage values for different compounds as shown in Figure S7.


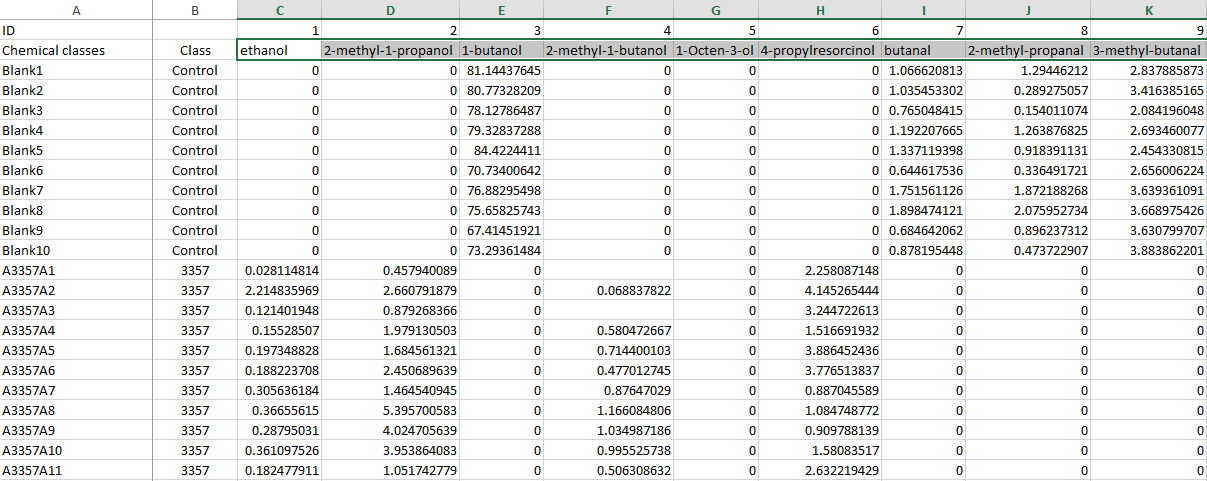


**Figure S7.** Subset of the input data (peak area percentage) format for different MVOCs from 6 isolates and a control.
